# Supplementary material for: Testosterone Levels and Type 2 Diabetes—No Correlation with Age, Differential Predictive Value in Men and Women
Source: PubMed Central journal article supplement (PMC6165105; doi:10.3390/biom8030076), 2018-08-20

# Supplementary Material

## Testosterone Levels and Type 2 Diabetes– No Correlation with Age, Differential Predictive Value in Men and Women

### Running Title: Testosterone levels and Type 2 Diabetes

**Mahir Karakas<sup>1,2</sup>, MD; Sarina Schäfer<sup>1,2</sup>, MD; Sebastian Appelbaum<sup>1</sup>, MSc; Francisco Ojeda<sup>1</sup>, PhD; Kari Kuulasmaa<sup>3</sup>, PhD; Burkhard-Ekkehart Brueckmann<sup>1</sup>; Filip Berisha<sup>1</sup>, MD; Benedict Schulte-Steinberg<sup>1</sup>, MD; Pekka Jousilahti<sup>3</sup>, MD; Stefan Blankenberg<sup>1,2</sup>, MD; Tarja Palosaari<sup>3</sup>, MSc; Veikko Salomaa<sup>3</sup>, MD and Tanja Zeller<sup>1,2\*</sup>, PhD**

<sup>1</sup>Department of General and Interventional Cardiology, University Heart Center, 20246 Hamburg, Germany, m.karakas@uke.de, sar.schaefer@uke.de, sebastian.appelbaum@tu-dortmund.de, f.ojeda-echevarria@uke.de, Burkhard.Brueckmann@uk-erlangen.de, f.berisha@uke.de, b.schulte-steinberg@uke.de, s.blankenberg@uke.de, t.zeller@uke.de

<sup>2</sup>German Center for Cardiovascular Research (DZHK), Partner Site Hamburg, Lübeck, Kiel, Hamburg, 20246 Hamburg Germany, m.karakas@uke.de, sar.schaefer@uke.de, s.blankenberg@uke.de, t.zeller@uke.de

<sup>3</sup>National Institute for Health and Welfare, 00271Helsinki, Finland, kari.kuulasmaa@thl.fi, pekka.jousilahti@thl.fi, tarja.palosaari@thl.fi, veikko.salomaa@thl.fi

**Table S1.**

**Distribution of baseline testosterone levels according to sex [nmol/L]**

|            | <b>Quartile 1</b> | <b>Quartile 2</b> | <b>Quartile 3</b> | <b>Quartile 4</b> |
|------------|-------------------|-------------------|-------------------|-------------------|
| Men, IQR   | 0; 12.91          | 12.91; 17.12      | 17.12; 22.02      | 22.02; 35.0       |
| Women, IQR | 0; 0.87           | 0.87; 1.15        | 1.15; 1.56        | 1.56; 35.0        |

Values are shown as normalized median values; IQR = interquartile range

**Figure S1**

**Distribution of baseline testosterone levels according to sex. A and B are shown for absolute testosterone levels, C and D are shown for log transformed testosterone levels.**

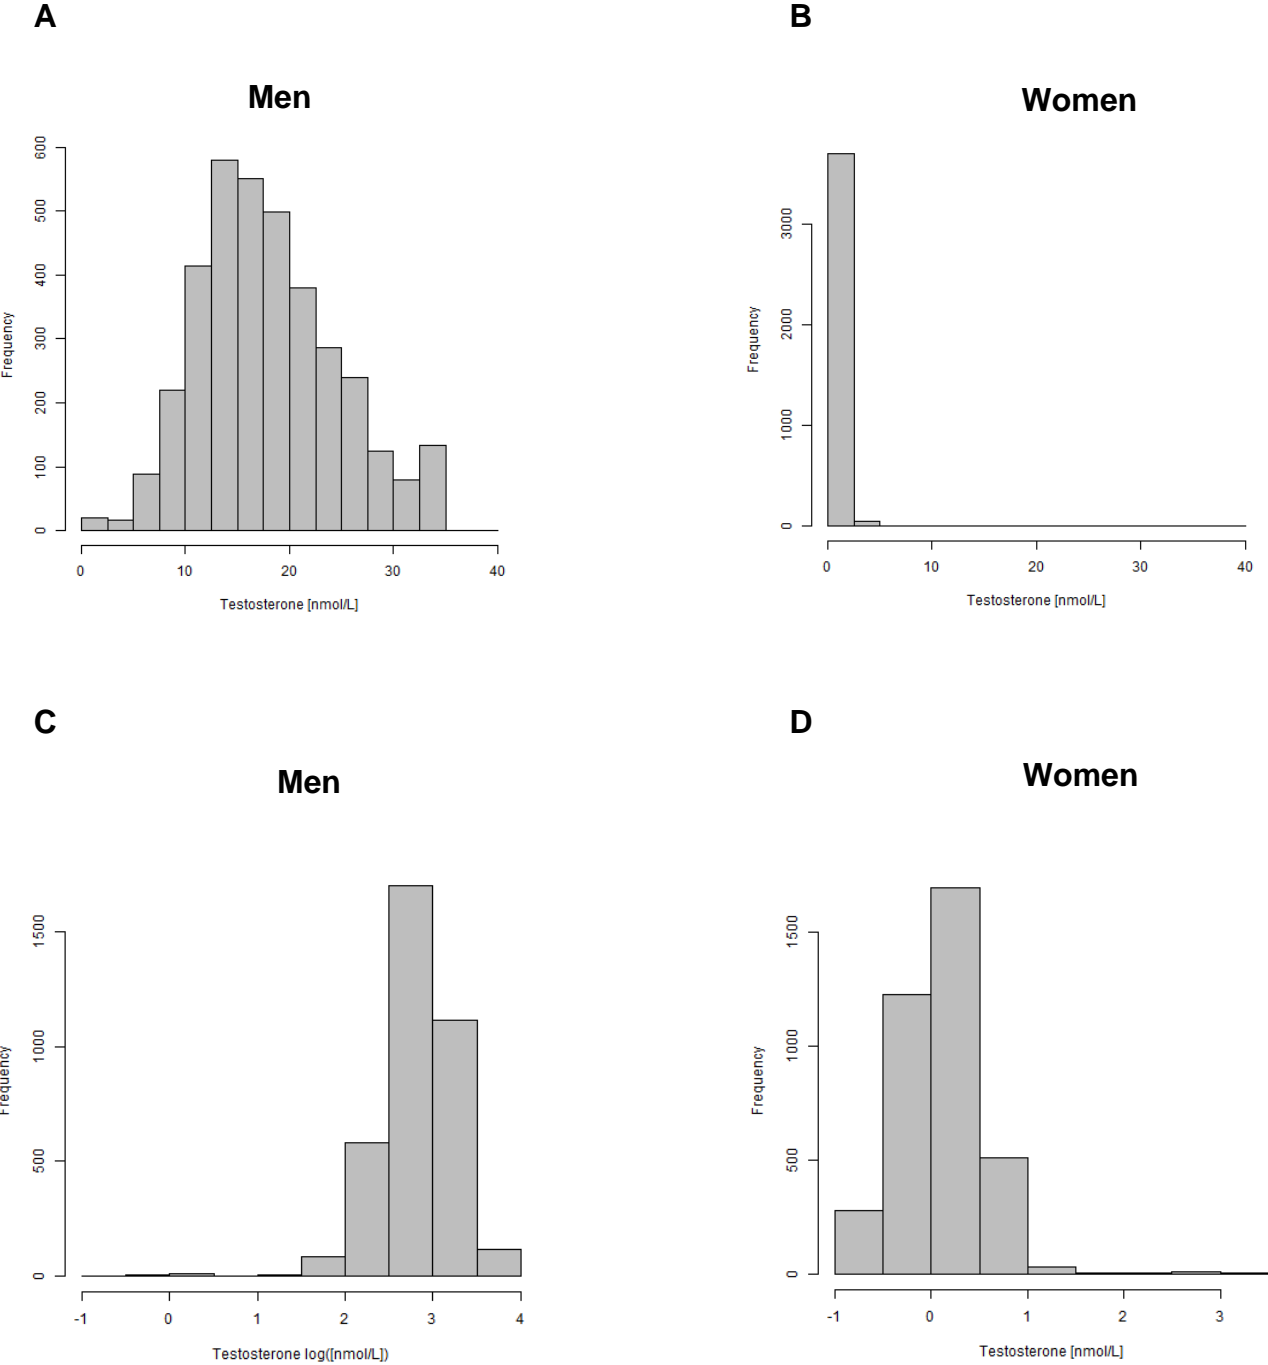

Supplement: biomolecules-08-00076-s001.pdf [file biomolecules-08-00076-s001.pdf]
